# Supplementary material
Source: PubMed Central journal article supplement (PMC3190302)

**Chemical Functionalization of Oligodeoxynucleotides with Multiple Boronic Acids  
for the Polyvalent Binding of Saccharides**

Amanda E. Hargrove, Andrew D. Ellington\*, Eric V. Anslyn\*, Jonathan L. Sessler\*

*Department of Chemistry and Biochemistry, University of Texas at Austin, 1 University*

*Station A5300, Austin, Texas 78712-0165*

**SUPPLEMENTARY INFORMATION**

---

\* To whom correspondence should be addressed. Phone: +1 512 471 4781, Email:

anslyn@austin.utexas.edu.

Figure S1. Paper chromatography in buffer indicated at pH 7.4: a) PBS (150 mM NaCl, 10 mM Na<sub>2</sub>HPO<sub>4</sub>); b) 2x PBS (300 mM NaCl, 20 mM Na<sub>2</sub>HPO<sub>4</sub>); c) 0.5x PBS (75 mM NaCl, 5 mM Na<sub>2</sub>HPO<sub>4</sub>); d) PBS + MgCl<sub>2</sub> (5 mM); e) PBS-NaCl (10 mM Na<sub>2</sub>HPO<sub>4</sub>). Lanes (0.25 pmol): 1 - **BBA-DNA<sub>1</sub>:BBA-DNA<sub>1</sub>c**; 2 - **DNA<sub>1</sub>:BBA-DNA<sub>1</sub>c**; 3 - **DNA<sub>1</sub>:DNA<sub>1</sub>c**; 4 - CELAPT14.11

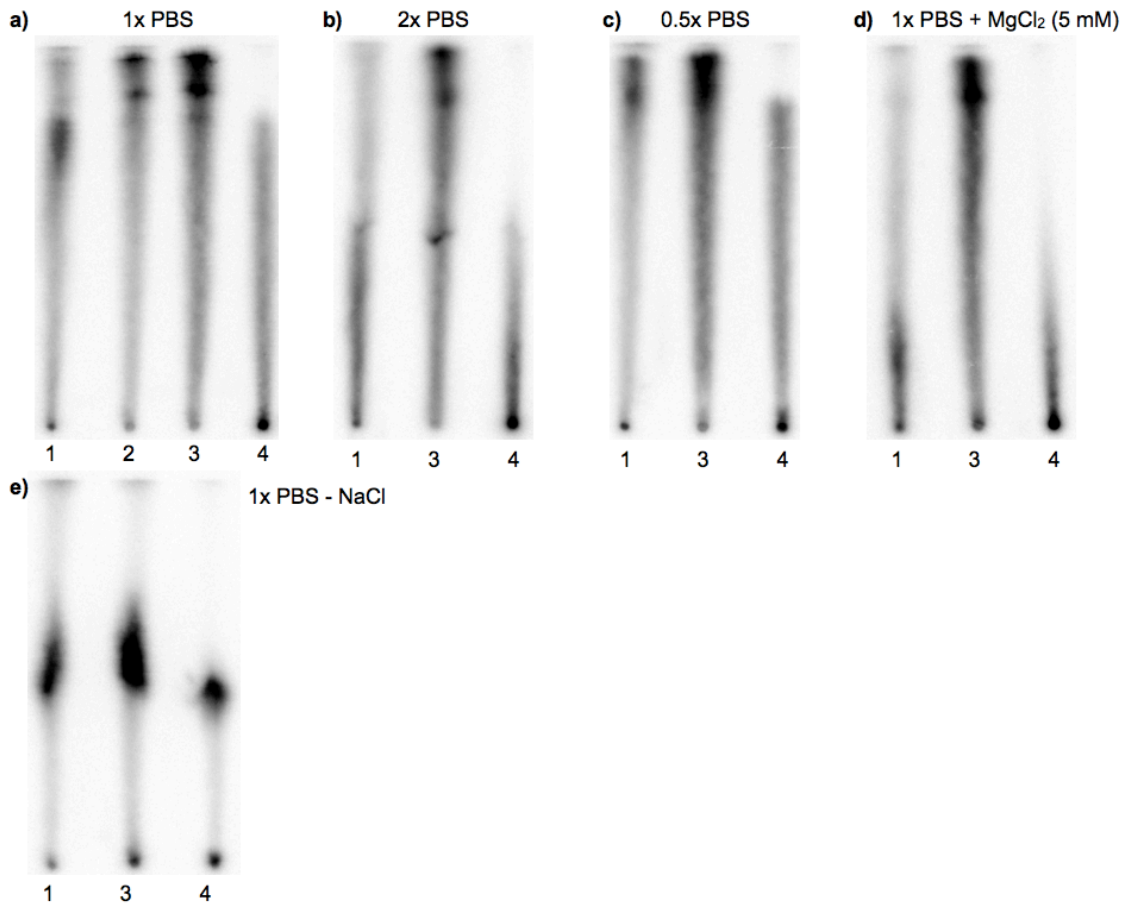

Figure S2. Paper chromatography in 20 mM Tris buffer (5 mM MgCl<sub>2</sub>, 100 mM NaCl) at indicated pH 7.4. Lanes (0.25 pmol): 1 - **BBA-DNA<sub>1</sub>:BBA-DNA<sub>1</sub>c**; 2 - **DNA<sub>1</sub>:BBA-DNA<sub>1</sub>c**; 3 - **DNA<sub>1</sub>:DNA<sub>1</sub>c**; 4 - CELAPT14.11.

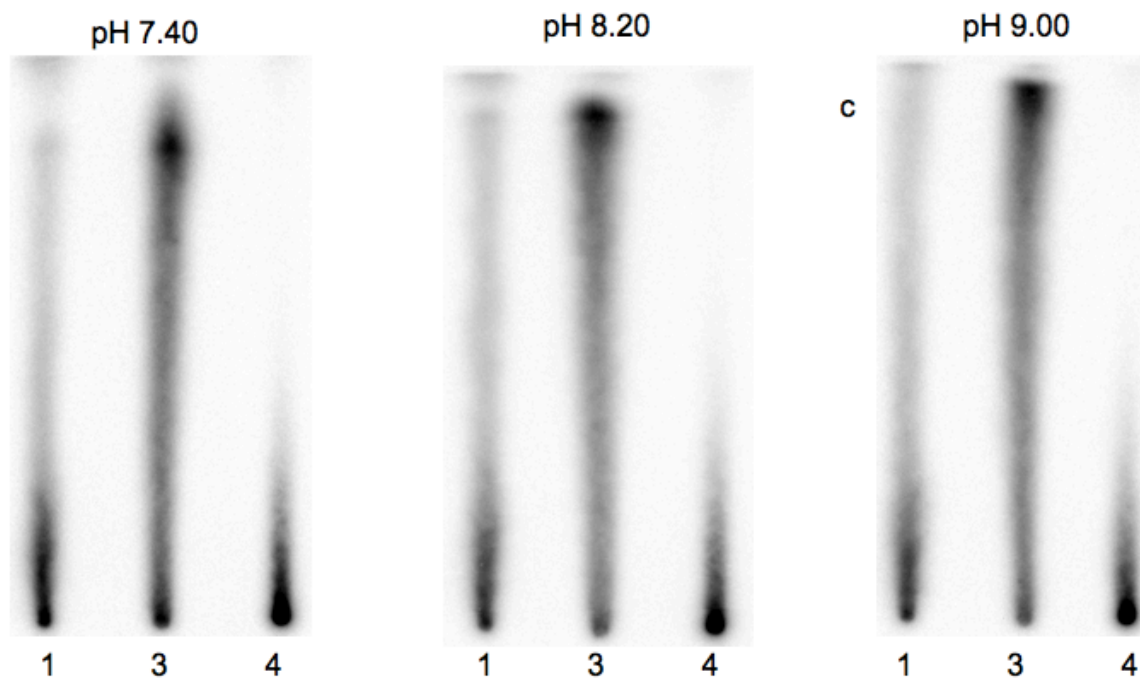

Figure S3. Paper chromatography in PBS buffer with 5 mM MgCl<sub>2</sub> and 0.1 M of the indicated saccharide. Lanes (0.25 pmol): 1 - **BBA-DNA<sub>1</sub>:BBA-DNA<sub>1c</sub>**; 2 - **DNA<sub>1</sub>:BBA-DNA<sub>1c</sub>**; 3 - **DNA<sub>1</sub>:DNA<sub>1c</sub>**; 4 - **CELAPT14.11**.

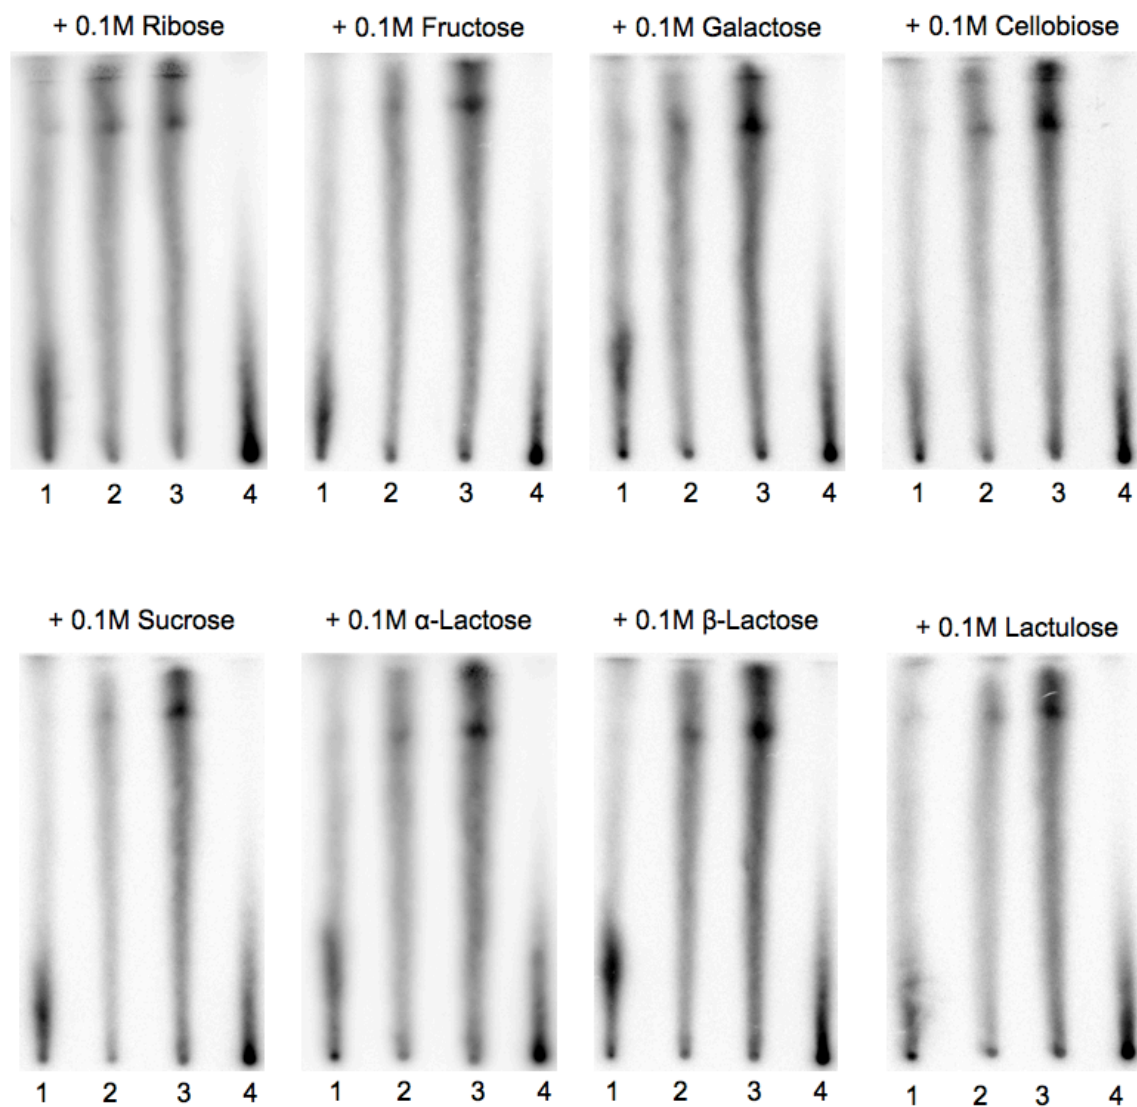

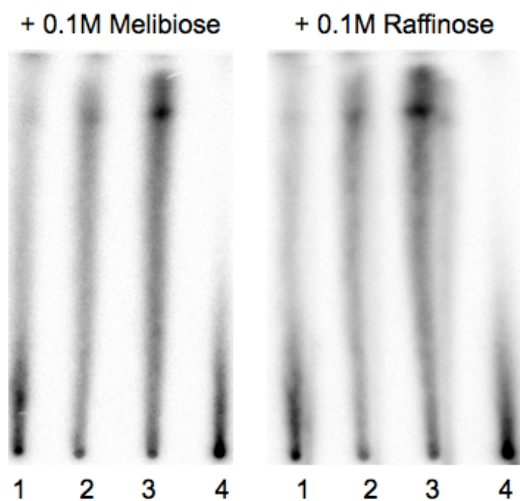

Figure S4. Example of Gaussian curve fitting of paper chromatography results using the Origin software and the data for maltose.

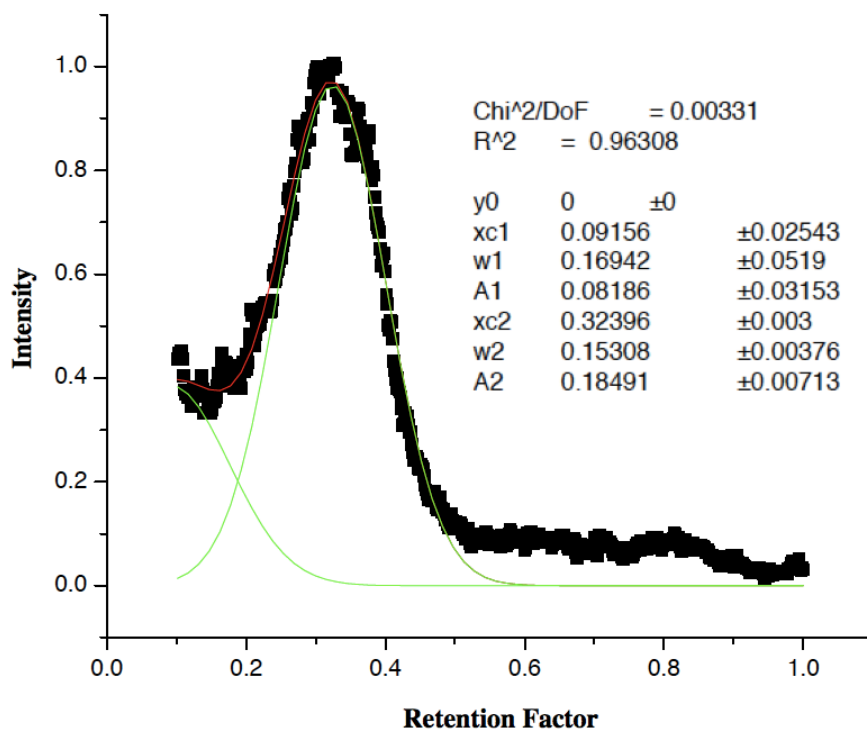

Supplement: NIHMS272087-supplement-1_si_001.pdf [file NIHMS272087-supplement-1_si_001.pdf]
